# Supplementary material for: Prothrombotic autoantibodies targeting platelet factor 4/polyanion are associated with pediatric cerebral malaria
Source: PubMed Central journal article supplement (PMC11142751; doi:10.1172/jci176466), 2024-04-23
Supplement: jci-134-176466-s221.pdf [file jci-134-176466-s221.pdf]

# Vera 2023\_Supplemental Figures

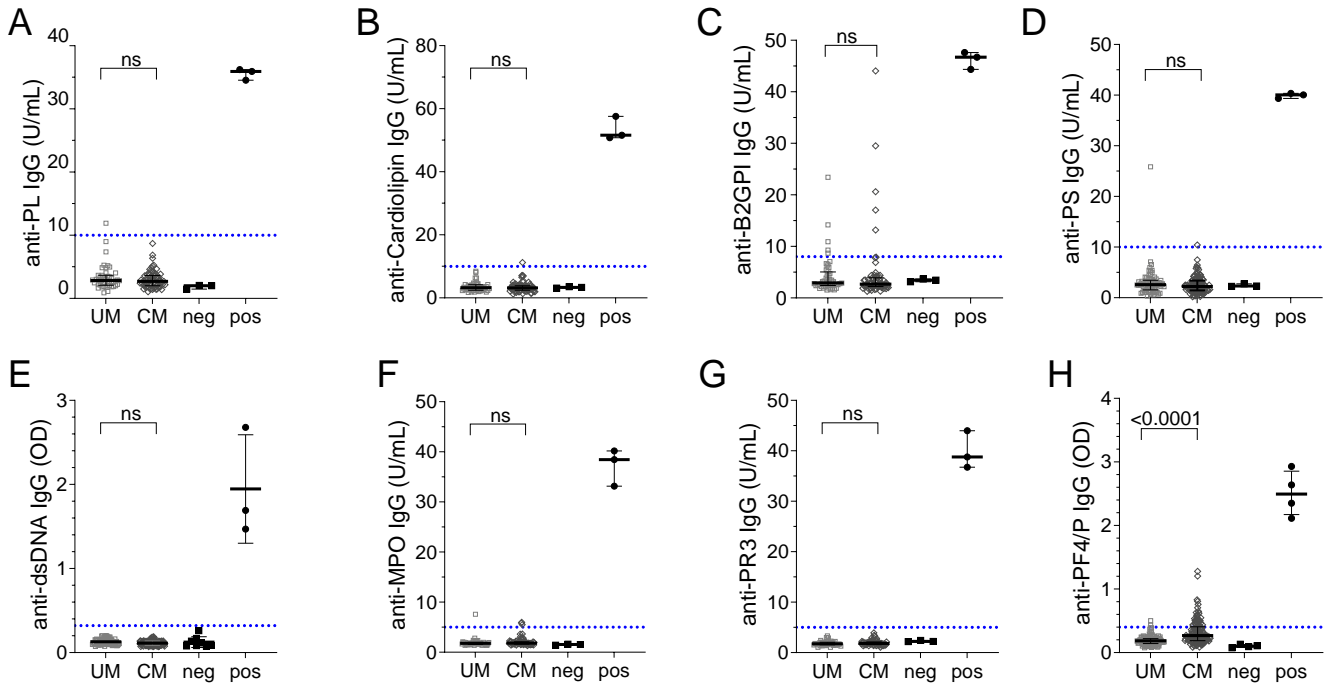

## Supplemental Figure S1. Analysis of procoagulant autoantibodies in uncomplicated (UM) versus cerebral malaria (CM).

Patient plasma samples (UM and CM) were analyzed for detection of autoantibodies A) anti-Phospholipid, (anti-PL; UM n=46, CM n=69), B) anti-Cardiolipin (UM n=44, CM n=69), C) anti  $\beta$ 2-Glycoprotein-I (anti- $\beta$ 2GPI; UM n=48, CM n=64), D) anti-Phosphatidylserine (anti-PS; UM n=74, CM n=105), E) anti-dsDNA (UM n=77, CM n=135), F), anti-Myeloperoxidase (anti-MPO; UM n=44, CM n=68), G) anti-Proteinase 3 (anti-PR3; UM n=46, CM n=69), and H) anti-Platelet Factor 4/Polyanion (anti-PF4/P; UM n=124, CM n=136). Data for UM and CM in (D) and (H) is also included in main text on Figures 5B and 2B, respectively. Interpolated antibody concentrations for A-D and F-G are shown as Units per milliliter (U/mL). For E and H, optical density values (OD) are shown. Dashed blue line represents the clinical cutoff based on the diagnostic assay, except for anti-DNA (E) which was an in-house assay and cutoff was determined as mean of negative control + 3x standard deviation. Internal negative controls (neg, n=3-4) and positive controls (pos, n=3-4) are shown. For anti-DNA, controls are plasma from healthy American adult volunteers (neg) and American SLE patients (pos). Mann-Whitney non-parametric analysis was used to determine statistical significance between UM and CM.

A

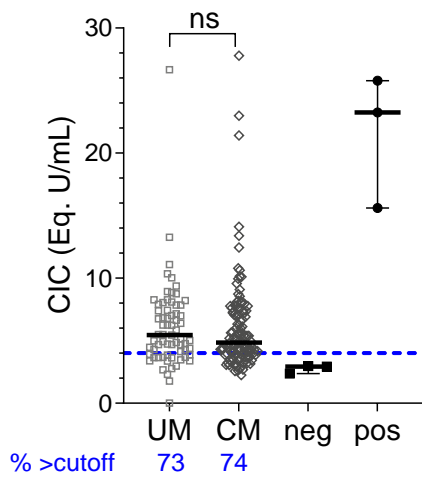

B

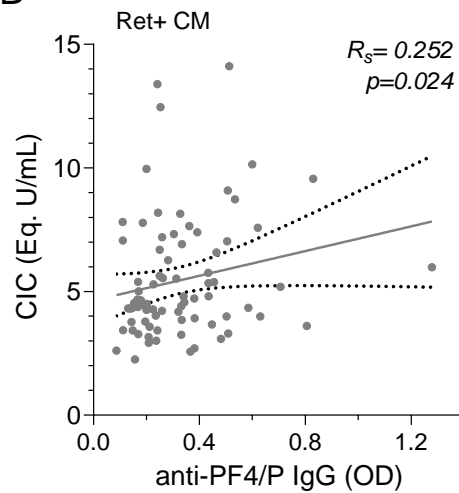

C

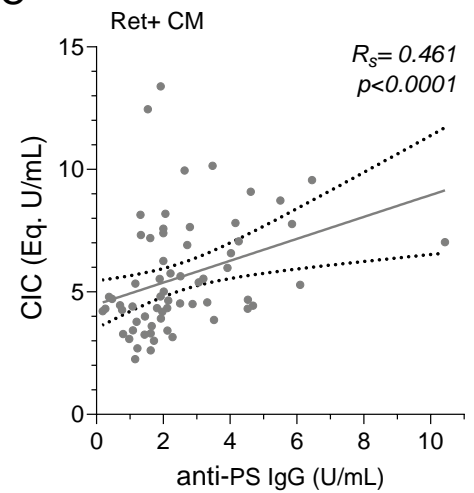

Supplemental Figure S2. Circulating immune complexes (CIC) are elevated in malaria.

A) Patient plasma samples for uncomplicated malaria (UM, N=67) and cerebral malaria (CM, N=121) were analyzed via ELISA assay for detection of circulating immune complexes (CIC). Calculated concentrations for CIC are shown as equivalent units per milliliter (Eq. U/mL)/mL. Comparisons between UM and CM were analyzed by Mann-Whitney non-parametric analysis. Dashed blue line represents the diagnostic assay's pre-determined cutoff level at 8 Eq. U/mL. Percent prevalence of patient samples above the cutoff (% > cutoff) are shown below x-axis label. Controls, included for reference, represent healthy American adult volunteers (neg, N=3) and American SLE patient plasma (pos, N=3). Spearman correlation analysis of CIC in Ret+ CM patient samples with levels of B) anti-PF4/P IgG, and (C) anti-PS IgG. Spearman rho ( $R_s$ ) and p-value (p) are shown within graph.

**Spearman correlation Matrix - Autoantibodies in UM**

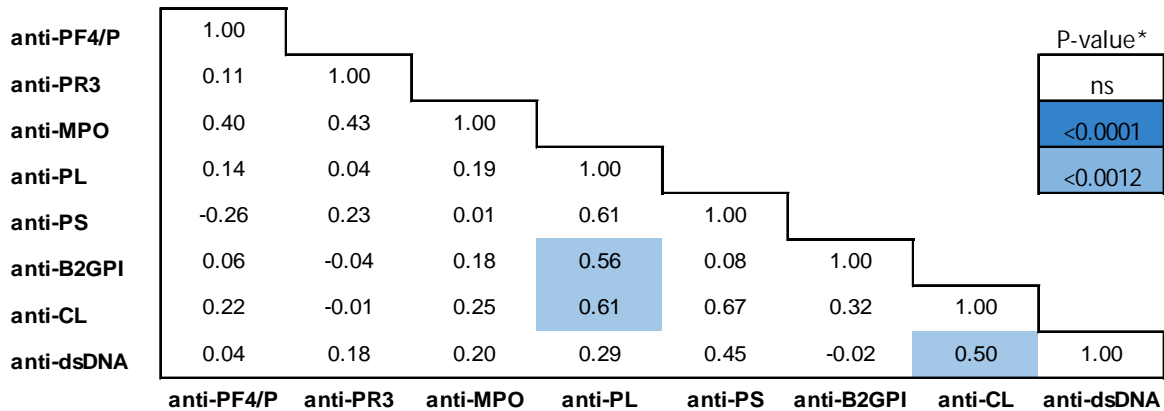

\*BKY discovery cutoff p-value = 0.0012

N=14-78

**Spearman correlation Matrix - Autoantibodies in Ret- CM**

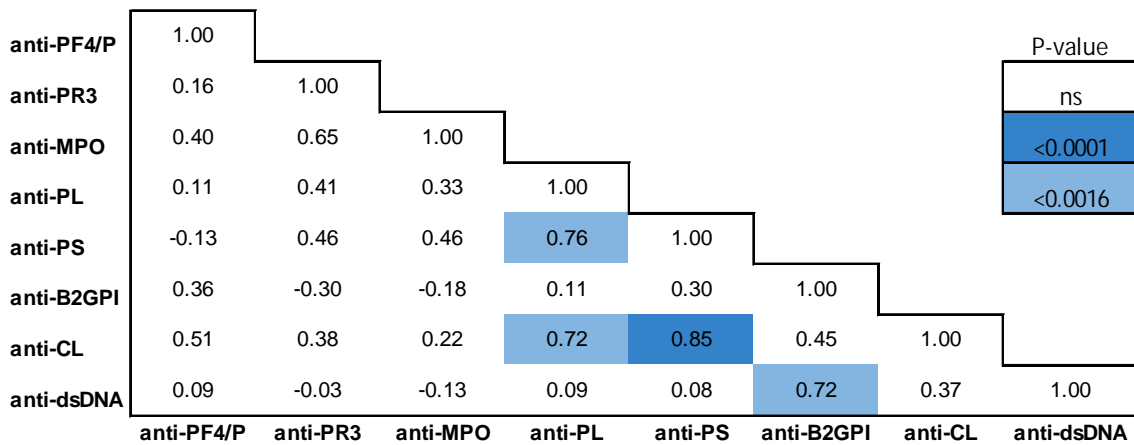

\*BKY discovery cutoff p-value = 0.0016

N=18-38

**Spearman correlation Matrix - Autoantibodies in Ret+ CM**

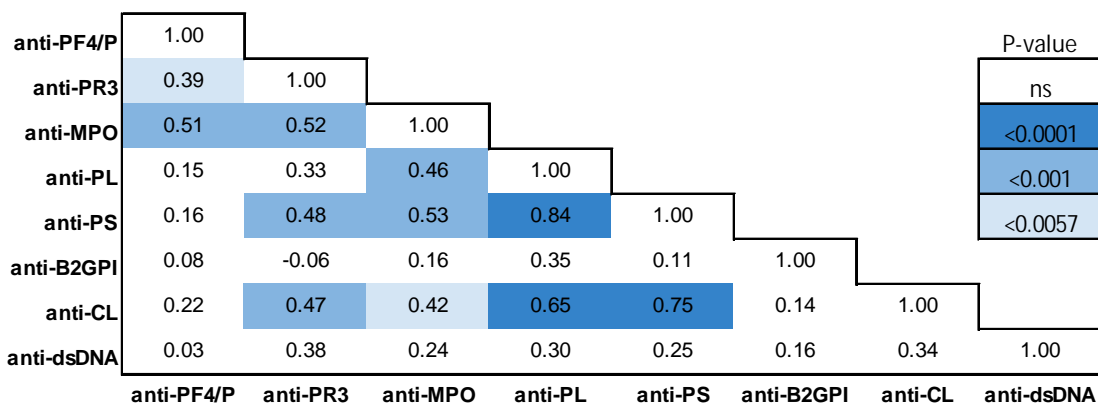

\*BKY discovery cutoff p-value = 0.0057

N = 43 - 100

**Supplemental Figure S3. Inter-correlation of autoantibodies in plasma of malaria patients.**

Spearman correlation analysis of autoantibody levels versus one another for UM, Ret- CM and Ret+ CM samples. Value within each cell of the heatmap is the calculated Spearman Rho. Each cell is color coded based on p-value significance as denoted in the legend. Multiple comparisons were adjusted using Benjamini, Krieger and Yekutieli Significance p-stack analysis method. Only values meeting the adjusted BKY p-value threshold for discovery are color coded in the heatmap and considered significant.

**A** Salmon sperm DNA vs. Human gDNA

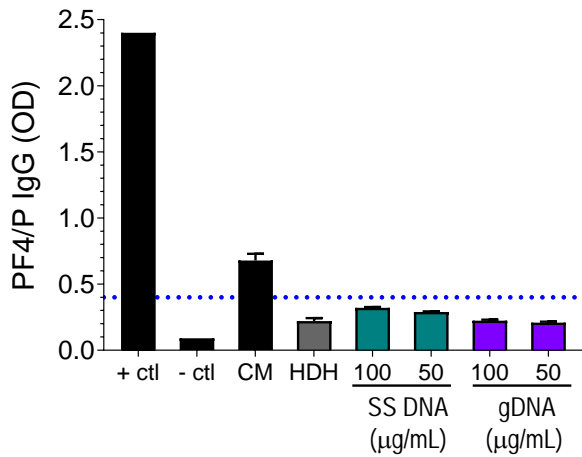

**B** DNA neutralization of anti-PF4/P binding: Salmon sperm DNA vs. Human gDNA

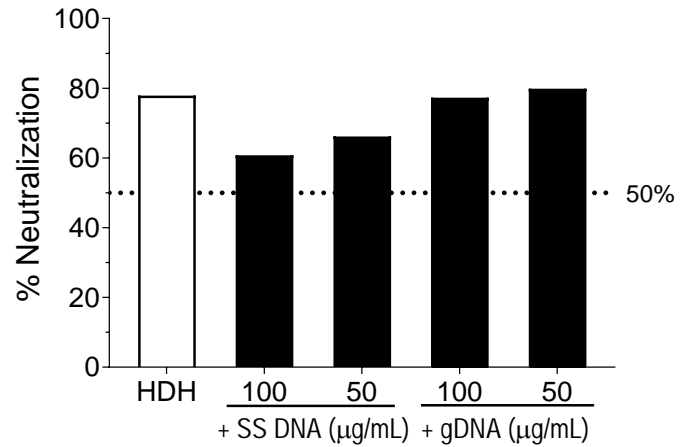

**Supplemental Figure S4. Double stranded DNA neutralization of IgG antibody binding to PF4:polyanion antigen.**

A) Patient plasma sample (CM) with elevated anti-PF4/P IgG was tested in EIA assay for PF4/P binding in the presence of double stranded DNA (SS; Salmon Sperm DNA) or extracted human genomic DNA (gDNA) at 50 or 100 $\mu$ g/mL. High dose heparin (HDH) at 100U/mL was included as control of inhibition. Positive (+ctl) and negative (-ctl) internal assay controls are included for reference. Optical density (OD) values are plotted for anti-PF4/P binding. OD value  $\geq$  0.40 cutoff is marked by the dashed blue line across the y-axis. Shown is mean  $\pm$  standard deviation. (B) Data from (A) converted to % neutralization calculated as  $[1 - (\text{OD sample w/ polyanion}) \div (\text{OD sample alone}) \times 100]$ . Neutralization of antibody binding that is greater than 50% (depicted by the black dashed line across the y-axis) is considered a positive test result. Data shown is representative of n=2 experimental replicates.

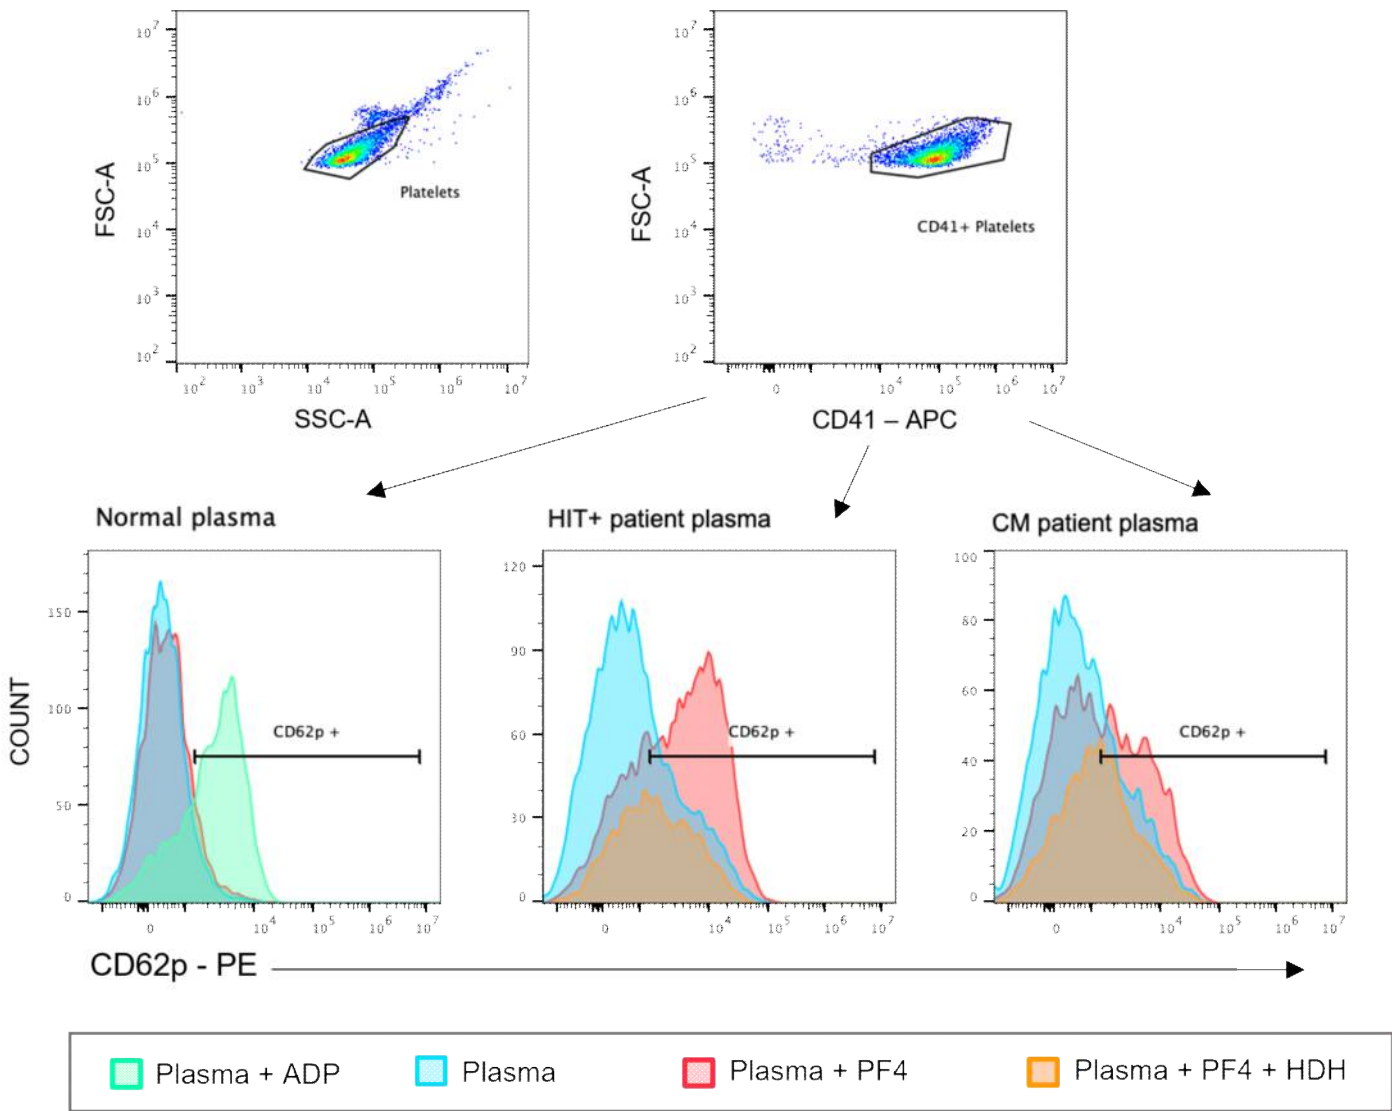

**Supplemental Figure S5. Flow cytometry detection of patient plasma-activated platelets in ex-vivo heterologous assay.**

Gating strategy for detection of activated platelets that express surface CD62p activation marker. Platelets within platelet rich plasma (prp) were identified by FSC/SSC in log scale and discriminated by staining with the pan-platelet specific marker CD41-APC. Platelet activation was measured by detection of anti-CD62p-PE and a shift to the right on the histogram within the CD41+ population. Normal Plasma is from healthy control volunteers serves as a negative control (blue histography), Normal plasma that was stimulated with 10 $\mu$ M adenosine diphosphate (ADP; green histography) serves as an internal positive control. Platelet stimulation with plasma from HIT+ patient or CM patient plasma under added exogenous hPF4 (15 $\mu$ g/mL) is shown in red histography. HIT+ or CM patient plasma with added exogenous hPF4 (15 $\mu$ g/mL) + high dose heparin (HDH, 200U/mL) to neutralize activation is shown in orange histography.

## Supplemental Table S1.

Correlation of immune and clinical markers associated with anti-PF4/P IgG.

| Process                                   | Variable    | UM             |               |            | Ret+ CM        |              |           |
|-------------------------------------------|-------------|----------------|---------------|------------|----------------|--------------|-----------|
|                                           |             | R <sub>s</sub> | p-value       | N          | R <sub>s</sub> | p-value      | N         |
| NETosis,<br>Inflammation & Cell<br>Damage | Total cfDNA | <b>0.248</b>   | <b>0.006</b>  | <b>123</b> | 0.170          | 0.091        | 100       |
|                                           | Host cfDNA  | 0.223          | 0.0530        | 76         | 0.178          | 0.079        | 99        |
|                                           | sST2        | <b>0.336</b>   | <b>0.028</b>  | <b>43</b>  | <b>0.321</b>   | <b>0.018</b> | <b>54</b> |
|                                           | MPO         | <b>0.268</b>   | <b>0.032</b>  | <b>64</b>  | 0.156          | ns           | 98        |
|                                           | IL-8        | 0.111          | ns            | 117        | 0.201          | 0.068        | 83        |
| Coagulation &<br>Platelet activation      | D-dimers    | <b>0.270</b>   | <b>0.039</b>  | <b>59</b>  | 0.165          | ns           | 46        |
|                                           | sCD62p      | -0.102         | ns            | 95         | 0.114          | ns           | 71        |
|                                           | sCD40L      | -0.060         | ns            | 58         | <b>-0.231</b>  | <b>0.032</b> | <b>86</b> |
| Parasite burden                           | PfHRP2      | <b>0.317</b>   | <b>0.007</b>  | <b>71</b>  | 0.171          | 0.089        | 100       |
|                                           | Pf cfDNA    | <b>0.323</b>   | <b>0.0002</b> | <b>123</b> | <b>0.286</b>   | <b>0.004</b> | <b>99</b> |
|                                           | Parasitemia | ND             | -             | -          | <b>0.204</b>   | <b>0.043</b> | <b>99</b> |
| Clinical parameter                        | PCV         | <b>-0.200</b>  | <b>0.029</b>  | <b>119</b> | -0.140         | ns           | 100       |
|                                           | Hemoglobin  | <b>-0.225</b>  | <b>0.015</b>  | <b>117</b> | -0.124         | ns           | 97        |
|                                           | Platelets   | 0.115          | ns            | 76         | <b>-0.201</b>  | <b>0.048</b> | <b>98</b> |

UM: Uncomplicated Malaria; Ret+ CM: Retinopathy positive cerebral malaria; R<sub>s</sub>: Spearman Rho; cfDNA: cell free DNA; sST2: soluble Suppression of Tumorigenicity 2; MPO: Myeloperoxidase; IL-8: Interleukin 8; PfHRP2: P. falciparum Histidine Rich Protein 2; PCV: Packed Cell Volume. Variables with a significant p-value < 0.05 are bolded and italicized. P-values ≤ 0.05 are bolded; ND: Not determined; ns: not significant.

**Supplemental Table S2.**

**Immune and clinical markers associated with Circulating Immune Complexes.**

| Process                           | Variable       | UM             |              |           | Ret+ CM        |                  |           |
|-----------------------------------|----------------|----------------|--------------|-----------|----------------|------------------|-----------|
|                                   |                | R <sub>s</sub> | p-value      | N         | R <sub>s</sub> | p-value          | N         |
| Autoantibody                      | anti-PF4/P IgG | <b>0.325</b>   | <b>0.007</b> | <b>67</b> | <b>0.252</b>   | <b>0.024</b>     | <b>79</b> |
|                                   | anti-PS IgG    | <b>0.438</b>   | <b>0.014</b> | <b>31</b> | <b>0.461</b>   | <b>&lt;0.001</b> | <b>64</b> |
| NETosis & Cell Damage             | Total cfDNA    | 0.160          | ns           | 66        | 0.167          | ns               | 86        |
|                                   | Host cfDNA     | -0.038         | ns           | 36        | 0.129          | ns               | 85        |
|                                   | sST2           | 0.172          | ns           | 29        | <b>0.326</b>   | <b>0.046</b>     | <b>38</b> |
|                                   | MPO            | -0.198         | ns           | 36        | <b>0.340</b>   | <b>0.002</b>     | <b>84</b> |
|                                   | IL-8           | -0.113         | ns           | 63        | 0.168          | ns               | 73        |
| Coagulation & Platelet activation | D-dimers       | 0.031          | ns           | 51        | 0.221          | ns               | 37        |
|                                   | sCD62p         | 0.110          | ns           | 45        | <b>0.445</b>   | <b>0.001</b>     | <b>53</b> |
|                                   | sCD40L         | -0.042         | ns           | 50        | 0.172          | ns               | 68        |
| Parasite burden                   | PfHRP2         | 0.149          | ns           | 63        | -0.019         | ns               | 87        |
|                                   | Pf cfDNA       | -0.090         | ns           | 36        | <b>0.280</b>   | <b>0.009</b>     | <b>85</b> |
|                                   | Parasitemia    | ND             | -            | -         | 0.102          | ns               | 86        |
| Clinical parameter                | PCV            | <b>-0.256</b>  | <b>0.040</b> | <b>62</b> | -0.017         | ns               | 87        |
|                                   | Hemoglobin     | <b>-0.313</b>  | <b>0.010</b> | <b>64</b> | 0.138          | ns               | 83        |
|                                   | Platelets      | 0.103          | ns           | 49        | 0.030          | ns               | 85        |

UM: Uncomplicated Malaria; Ret+ CM: Retinopathy positive cerebral malaria; R<sub>s</sub>: Spearman Rho; cfDNA: cell free DNA; sST2: soluble Suppression of Tumorigenicity 2; MPO: Myeloperoxidase; IL-8: Interleukin 8; PfHRP2: P. falciparum Histidine Rich Protein 2; PCV: Packed Cell Volume. Variables with a significant p-value < 0.05 are bolded and italicized. P-values ≤ 0.05 are bolded; ND: Not determined; ns: not significant.

### Supplemental Table S3.

#### Correlation of immune and clinical markers associated with anti-PS IgG.

| Process                                   | Variable    | UM           |                   |           | Ret+ CM       |              |           |
|-------------------------------------------|-------------|--------------|-------------------|-----------|---------------|--------------|-----------|
|                                           |             | Rho          | p-value           | N         | Rho           | p-value      | N         |
| NETosis,<br>Inflammation & Cell<br>Damage | Total cfDNA | <b>0.405</b> | <b>0.0004</b>     | <b>73</b> | <b>-0.230</b> | <b>0.048</b> | <b>75</b> |
|                                           | Host cfDNA  | <b>0.407</b> | <b>0.017</b>      | <b>63</b> | <b>-0.365</b> | <b>0.001</b> | <b>75</b> |
|                                           | sST2        | -0.115       | ns                | 37        | 0.153         | ns           | 45        |
|                                           | MPO         | <b>0.497</b> | <b>0.005</b>      | <b>70</b> | 0.054         | ns           | 75        |
|                                           | IL-8        | -0.007       | ns                | 70        | -0.045        | ns           | 67        |
| Coagulation &<br>Platelet activation      | D-dimers    | -0.035       | 0.039             | 31        | 0.228         | ns           | 32        |
|                                           | sCD62p      | <b>0.524</b> | <b>&lt;0.0001</b> | <b>66</b> | <b>0.367</b>  | <b>0.006</b> | <b>55</b> |
|                                           | sCD40L      | <b>0.336</b> | <b>0.005</b>      | <b>67</b> | <b>0.253</b>  | <b>0.034</b> | <b>70</b> |
| Parasite burden                           | PfHRP2      | -0.189       | ns                | 33        | <b>-0.274</b> | <b>0.017</b> | <b>75</b> |
|                                           | Pf cfDNA    | 0.215        | 0.068             | 34        | 0.069         | ns           | 79        |
|                                           | Parasitemia | ND           | -                 | -         | 0.104         | ns           | 78        |
| Clinical parameter                        | PCV         | 0.083        | ns                | 71        | -0.066        | ns           | 79        |
|                                           | Hemoglobin  | 0.019        | ns                | 71        | 0.113         | ns           | 77        |
|                                           | Platelets   | 0.013        | ns                | 36        | 0.100         | ns           | 78        |

UM: Uncomplicated Malaria; Ret+ CM: Retinopathy positive cerebral malaria; Rs: Spearman Rho; cfDNA: cell free DNA; sST2: soluble Suppression of Tumorigenicity 2; MPO: Myeloperoxidase; IL-8: Interleukin 8; PfHRP2: *P. falciparum* Histidine Rich Protein 2; PCV: Packed Cell Volume. Variables with a significant p-value < 0.05 are bolded and italicized. P-values ≤ 0.05 are bolded; ND: Not determined; ns: not significant.

### Supplemental Table S4. Regression analysis of Anti-PS IgG with clinical outcomes/complications in Ret+ CM.

| Variable              | Odds Ratio | OR 95% CI   | Beta  | Beta 95% CI     | Beta p-value | AUC  | AUC p-value | N  | N with complication |
|-----------------------|------------|-------------|-------|-----------------|--------------|------|-------------|----|---------------------|
| Severe Malaria Anemia | 0.95       | 0.73 - 1.35 | -0.06 | -0.385 to 0.230 | 0.714        | 0.51 | 0.840       | 81 | 24                  |
| Respiratory Distress  | 1.26       | 0.97 - 1.84 | 0.23  | -0.066 to 0.548 | 0.751        | 0.51 | 0.385       | 81 | 18                  |
| Jaundice              | 0.93       | 0.46 - 1.35 | -0.08 | -0.653 to 0.335 | 0.751        | 0.51 | 0.893       | 81 | 8                   |
| Death                 | 0.93       | 0.63 - 1.40 | -0.08 | -0.542 to 0.281 | 0.705        | 0.50 | 0.991       | 81 | 12                  |
